# Supplementary material for: Opioid Overdose Risk and Resilience Among Older Black Men in Chicago: Findings from Community-Based Focus Groups
Source: Research Square preprint supplement (doi:10.21203/rs.3.rs-8188680/v1), 2025-12-11
Supplement: Supplementary file 1 [file a7a56cf459186b97c97ef818.docx]

**Focus Group Instrument**

**Data Presentation:** Brief overview of statistics on opioid overdose rates among African American men by age group, compared to statistics for other gender and racial groups.

1. Looking at these numbers, are you surprised?
   1. Why or why not?
2. Why do you think the fatality rates are so high among African American men, especially those over the age of 50 compared to other persons who also use opioids like heroin and fentanyl?
   1. What do you think is different about older AA men who use opioids that accounts for them having higher OD and fatality rates?
      1. **Probe:** They/I use opioids alone, which can increase the risk of fatal overdoses.
      2. **Probe:** They/I prefer to snort heroin so do not obtain services provided at syringe services programs because they believe the services do not apply to people who snort their drugs.
      3. **Probe:** They/I prefer not to have anyone else know about their drug use because of concern about losing their housing or having family/friends find out.
      4. **Probe:** They/I have had bad experiences in treatment programs or receiving health care in the past and only get care now when it is absolutely necessary.
      5. **Probe:** They/I purchase heroin/fentanyl at the beginning of the month or when they receive financial aid and then use less the rest of the month, risking a decrease tolerance.
      6. **Probe:** How many times have They/I tried to stop using opioids? What was the longest time They/I went without using opioids and what contributed to that success? What contributed to relapse?
3. What do you think can be done to reduce fatalities among African American men?
   1. **Probe:** Are there locations where outreach could be more effective? Specifically: Community organizations or homeless encampments
   2. **Probe:** What can be done to reach people who use alone?
   3. **Probe:** How enthusiastic do you think people in your community would be about receiving support or services from the following sources?
      1. A peer specialist – someone with lived experience who has used drugs and now provides counseling or guidance
      2. A phone line where they could contact a support system whenever needed
      3. A Mobile app that they could use to access support resources and stay connected
      4. Methadone services at a clinic
         1. **Probe:** Do people use these to avoid withdrawal in between times when they can access their preferred substance?
4. What has been your experience getting and using naloxone?
   1. **Probe:** Is it hard or easy to get?
   2. **Probe:** Do you keep some with you at all time when you are using heroin and fentanyl?
   3. **Probe:** We have heard reports that some persons who use opioids have had bad experiences with naloxone and received too much putting them into withdrawal. Has this made you more reluctant to get and use naloxone?
5. How do you and others in your community make decisions about which substances to use and where to obtain them?
   1. **Probe:** Do you seek out specific mixes of substances, like fentanyl combined with heroin or cocaine?
   2. **Probe:** Do you avoid certain combinations, such as fentanyl?
   3. **Probe:** Would knowing about a particular dealer’s involvement in overdose incidents change your purchasing choices?
6. Of everything we’ve talked about today, what do you think is the most important action to take to reduce fatalities?
   1. If you had to choose one or two key interventions, what would they be?
   2. Why is this the most important?
7. Is there anything else you think is important for us to know that we haven’t already covered?
